# Supplementary figures and images for: Diversity of Human Enterovirus Co-Circulations in Five Kindergartens in Bangkok between July 2019 and January 2020
Source: MDPI journal article supplement (doi:10.3390/v15061397), 2023-06-20

A

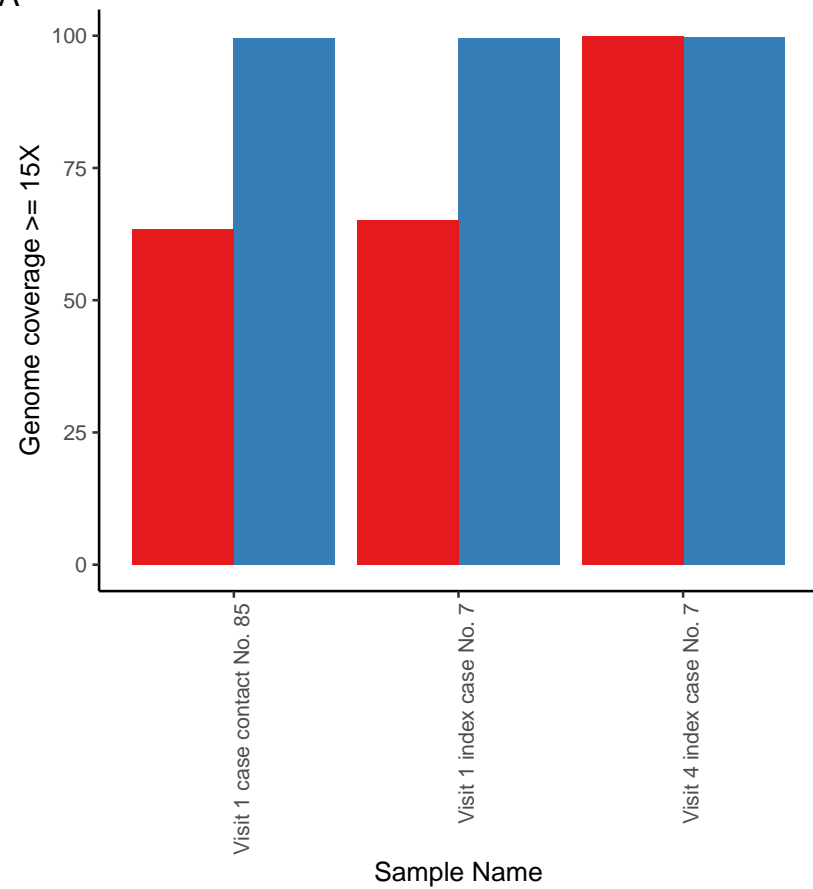

B

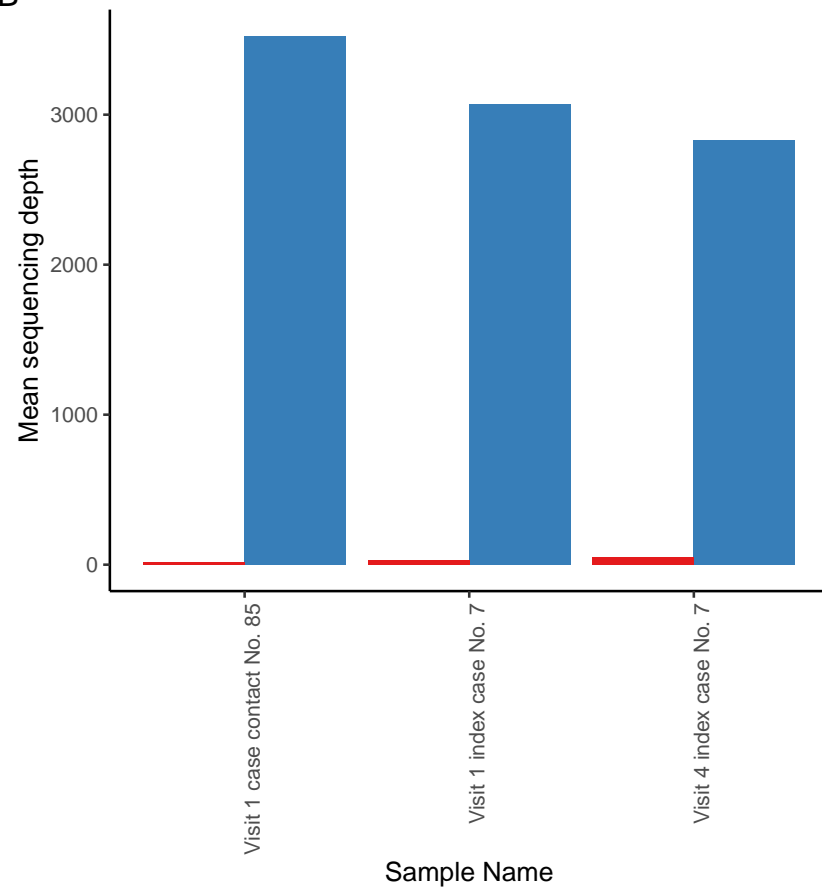

C

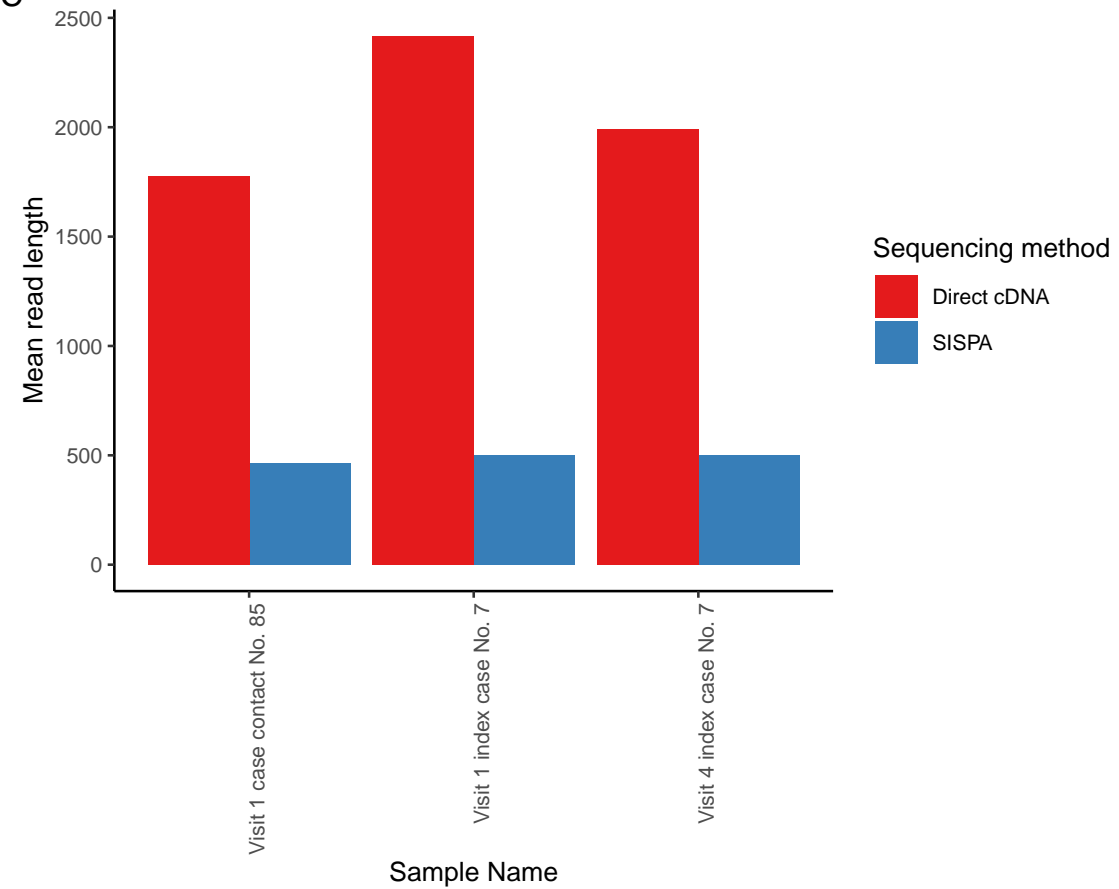

Supplement: s1 [file s1]
